# Supplementary material
Source: Springer Nature journal article supplement (https://www.springermedizin.de/resource/supplementary/12885_2012_3552_MOESM5_ESM.pdf/9463602)

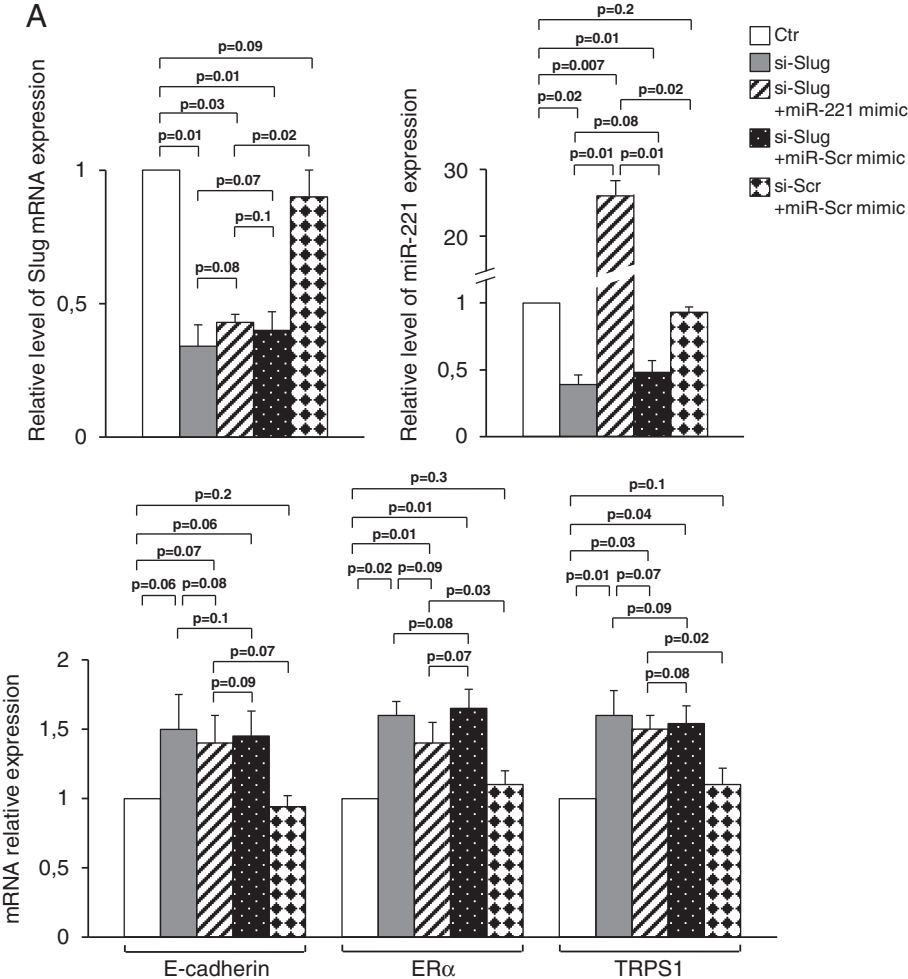

**B**

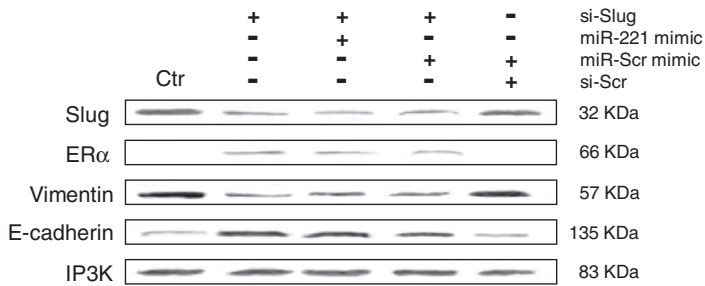

Supplement: MOESM5 [file 9463602]
